# Supplementary material for: Real-time tracking of metal nucleation via local perturbation of hydration layers
Source: PubMed Central journal article supplement (PMC5645439; doi:10.1038/s41467-017-01087-1), 2017-10-17
Supplement: 41467_2017_1087_MOESM1_ESM.pdf [file 41467_2017_1087_MOESM1_ESM.pdf]

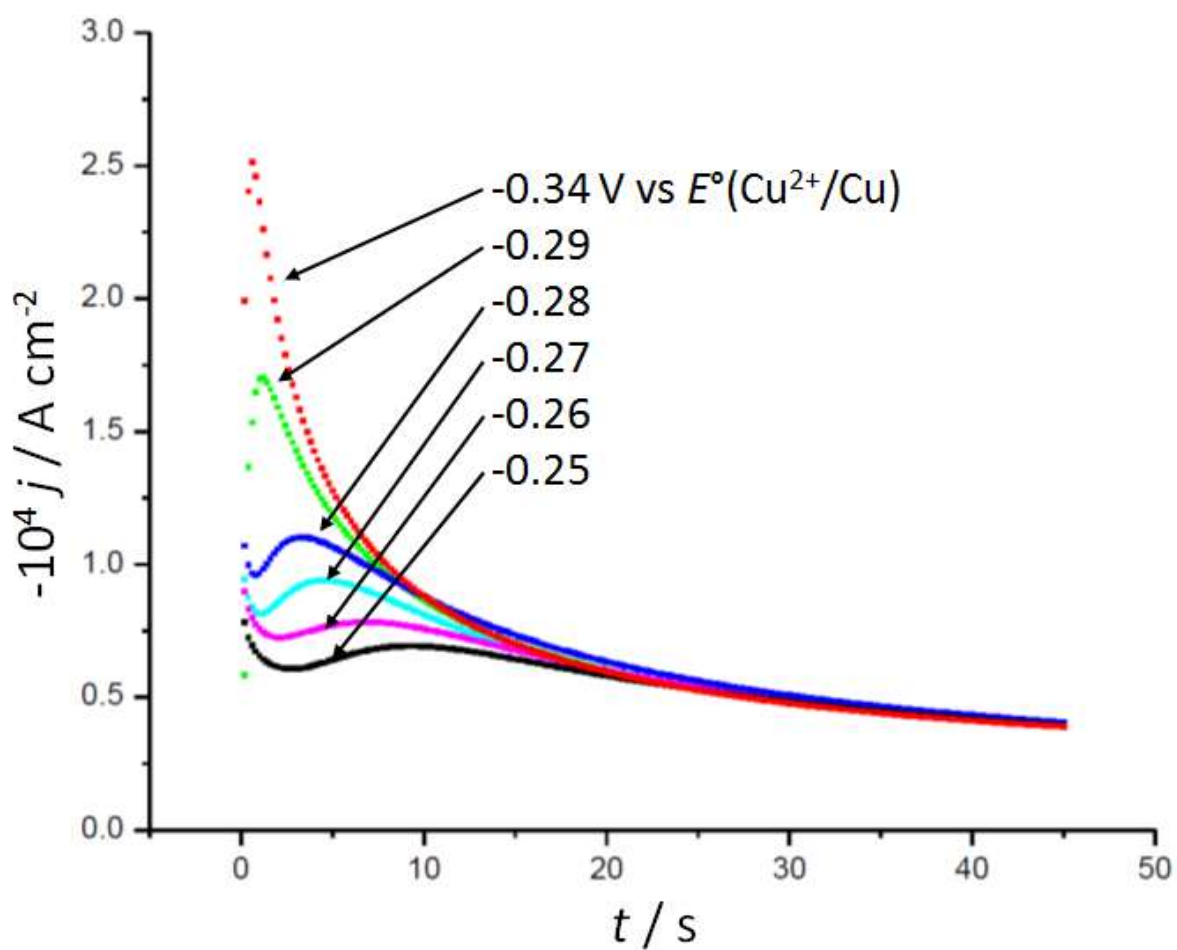

**Supplementary Figure 1.** Characteristic chronoamperometric transients at ITO electrodes in aqueous solution of  $\text{CuSO}_4$   $1.0 \times 10^{-3} \text{ mol} \times \text{dm}^{-3}$  at various overpotentials and room temperature. The electrolyte solution contained  $50 \times 10^{-3} \text{ mol} \times \text{dm}^{-3}$   $\text{Na}_2\text{SO}_4$  at pH 3.

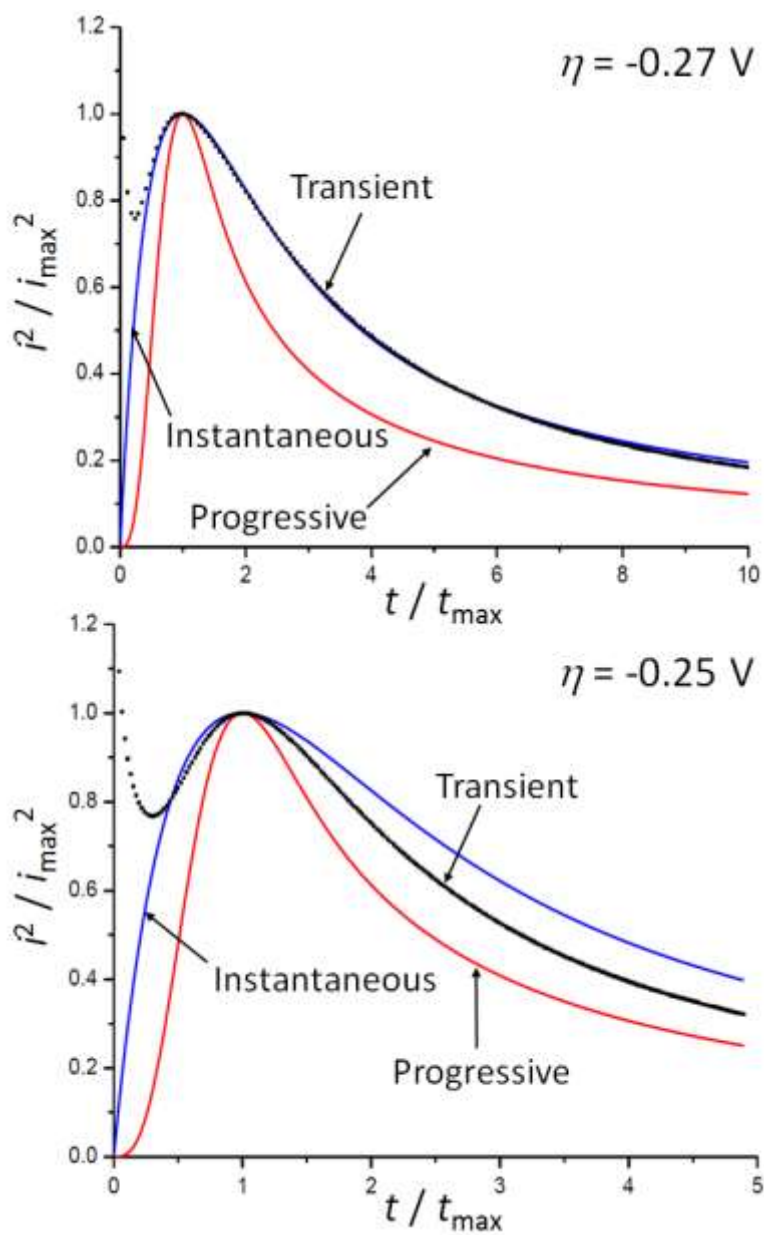

**Supplementary Figure 2.** Dimensionless plot of the current ( $i$ ) normalised by the maximum current ( $i_{max}$ ) as a function of time ( $t$ ) at two overpotentials. The experimental conditions are described in the caption of **Supplementary Figure 1**. The *instantaneous* and *progressive* nucleation limits as predicted by the Scharifker-Hills model<sup>1</sup> are indicated.

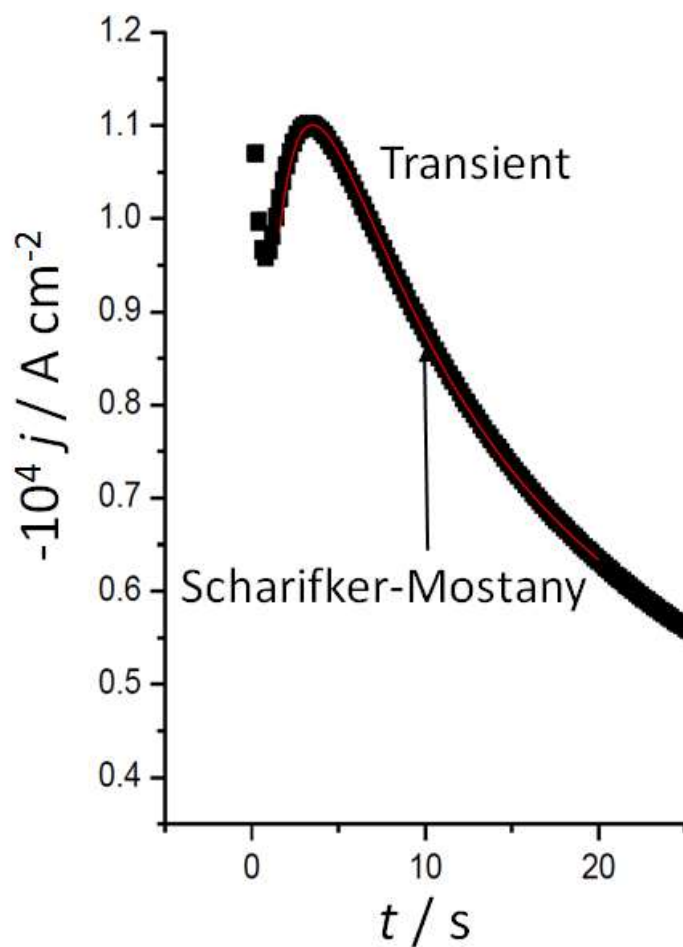

**Supplementary Figure 3.** Chronoamperometric transient recorded at  $-0.27$  V fitted to the Scharifker-Mostany model.<sup>2</sup> Concentration of  $\text{CuSO}_4$  is  $1.0 \times 10^{-3} \text{ mol} \times \text{dm}^{-3}$ . Nuclei number density and nucleation rate of  $5.3 \times 10^6 \text{ cm}^{-2}$  and  $15 \text{ s}^{-1}$ , respectively, were estimated from the fit.

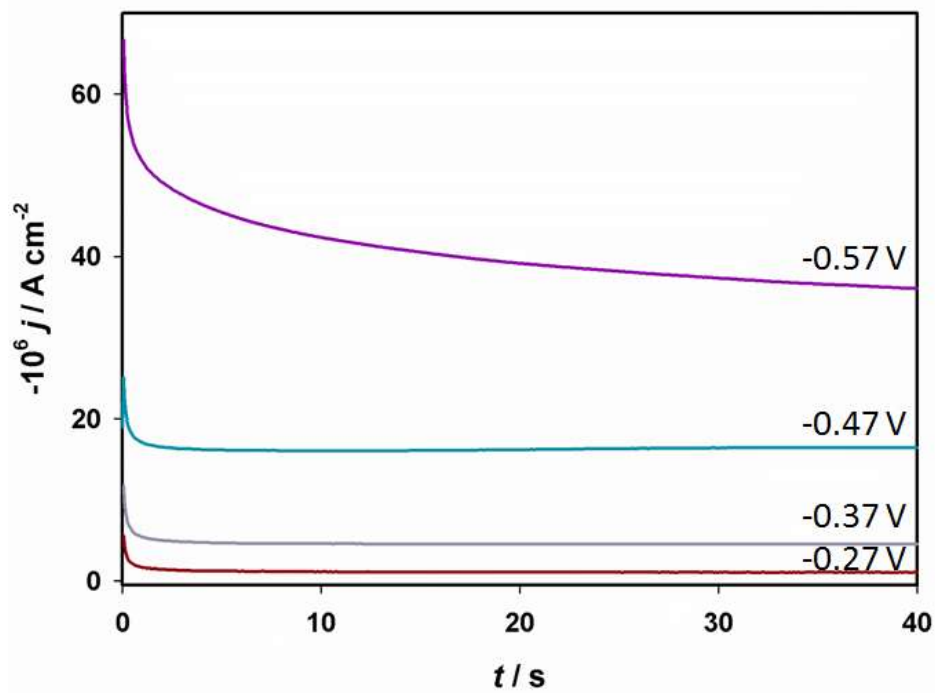

**Supplementary Figure 4.** Chronoamperometric transients recorded at various overpotentials on ITO electrodes at a  $\text{CuSO}_4$  concentration of  $1.0 \times 10^{-4} \text{ mol} \times \text{dm}^{-3}$ . Other experimental conditions are described in the caption of **Supplementary Figure 1**. The lack of a well-defined current peak and diffusion limiting current suggest a convolution of the dynamics of electron transfer and nucleation.

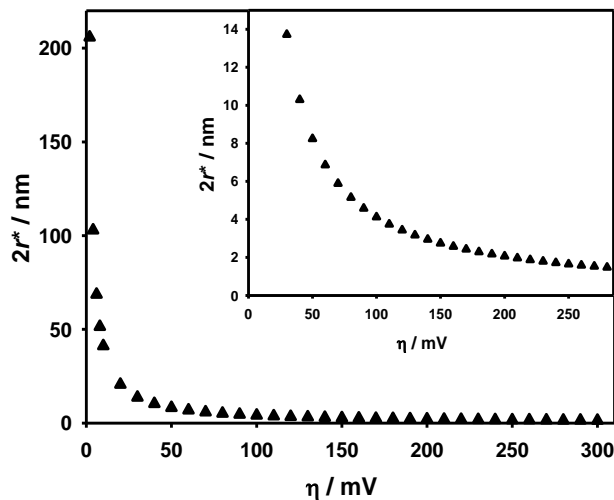

**Supplementary Figure 5.** Critical nucleus diameter ( $2r^*$ ) as a function of the overpotential ( $\eta$ ), estimated from **equation 1**. In **equation (1)**  $\sigma$  represents the surface tension,  $M$  is the atomic weight ( $M$ ) and  $\rho$  is the density.<sup>3</sup> This simple relation predicts stable Cu nuclei of 1.5 nm diameter can be formed at overpotentials of -0.27 V. Our experimental observations based on HS-LMFM images revealed stable nuclei of the order of 6-7 nm. Considering that no tip-shape deconvolution routines were applied to these images, our experimental values are close to the thermodynamic limit.

$$r^* = 2\sigma M / \rho zF |\eta| \quad (1)$$

### Supplementary References

- 1 Scharifker, B. & Hills, G. Theoretical and Experimental Studies of Multiple Nucleation. *Electrochim Acta* **28**, 879-889 (1983).
- 2 Scharifker, B. R. & Mostany, J. 3-Dimensional Nucleation with Diffusion Controlled Growth.1. Number Density of Active-Sites and Nucleation Rates per Site. *J Electroanal Chem* **177**, 13-23 (1984).
- 3 Scharifker, B. R. & Mostany, J. in *Encyclopedia of Electrochemistry: Interfacial Kinetics and Mass Transport* Vol. 2 (eds A.J. Bard, M. Stratmann, & E.J. Calvo) 512-540 (Wiley, 2003).
