# Supplementary material for: Real-time tracking of metal nucleation via local perturbation of hydration layers
Source: PubMed Central journal article supplement (PMC5645439; doi:10.1038/s41467-017-01087-1), 2017-10-17
Supplement: 41467_2017_1087_MOESM3_ESM.pdf [file 41467_2017_1087_MOESM3_ESM.pdf]

## **Description of Additional Supplementary Files**

File Name: Supplementary Movie 1

Description: Initial stages of Cu nucleation and growth at 58 x 58 nm ITO surface during 49 s, at a constant overpotential of -0.27 V.”

File Name: Supplementary Movie 2

Description: Growth on a pre-formed stable Cu nucleus on the ITO surface over a period of 57 s at an overpotential of -0.27 V. The final frame shows a superimposed 3D image of the particular growth (as in Figure 5c).”
